# Supplementary material for: The sodium/glucose cotransporters as potential therapeutic targets for CF lung diseases revealed by human lung organoid swelling assay
Source: PubMed Central journal article supplement (PMC8666609; doi:10.1016/j.omtm.2021.11.008), 2021-11-24
Supplement: mmc1.pdf [file mmc1.pdf]

**OMTM, Volume 24**

**Supplemental information**

**The sodium/glucose cotransporters as potential  
therapeutic targets for CF lung diseases  
revealed by human lung organoid swelling assay**

**Hiroyuki Hirai, Xiubin Liang, Yifei Sun, Yihan Zhang, Jifeng Zhang, Y. Eugene  
Chen, Hongmei Mou, Youyang Zhao, and Jie Xu**

## Supplementary Data

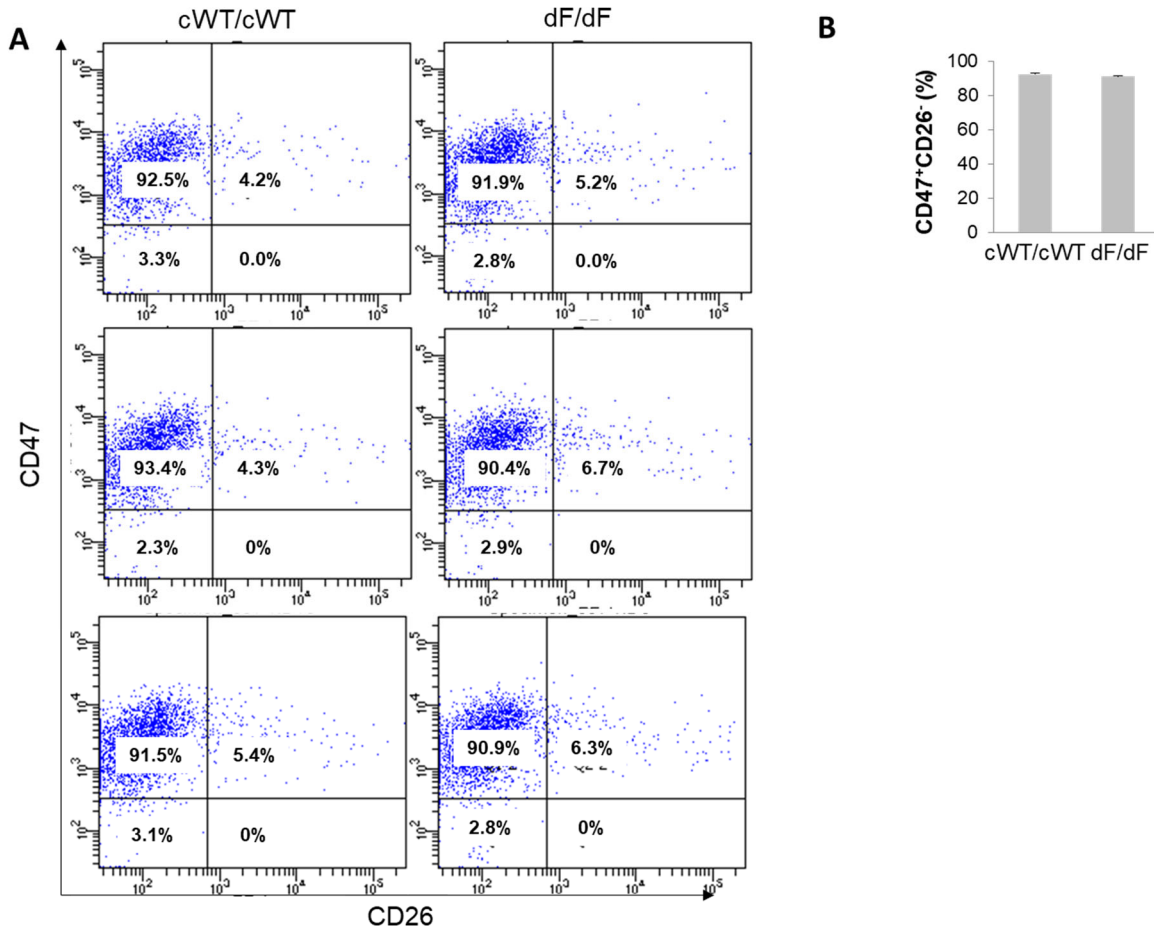

**Figure S1. Generation of lung epithelial progenitor from CF patient derived iPSCs. (A)**

Representative flow cytometry result of CD47 and/or CD26 positive cells on Day 14-15 during HLO derivation process. CD47<sup>hi</sup>/CD26<sup>lo</sup> indicate lung epithelial progenitors. (B) Quantitative summary of CD47<sup>hi</sup>/CD26<sup>lo</sup> cell percentages from flow cytometry results.

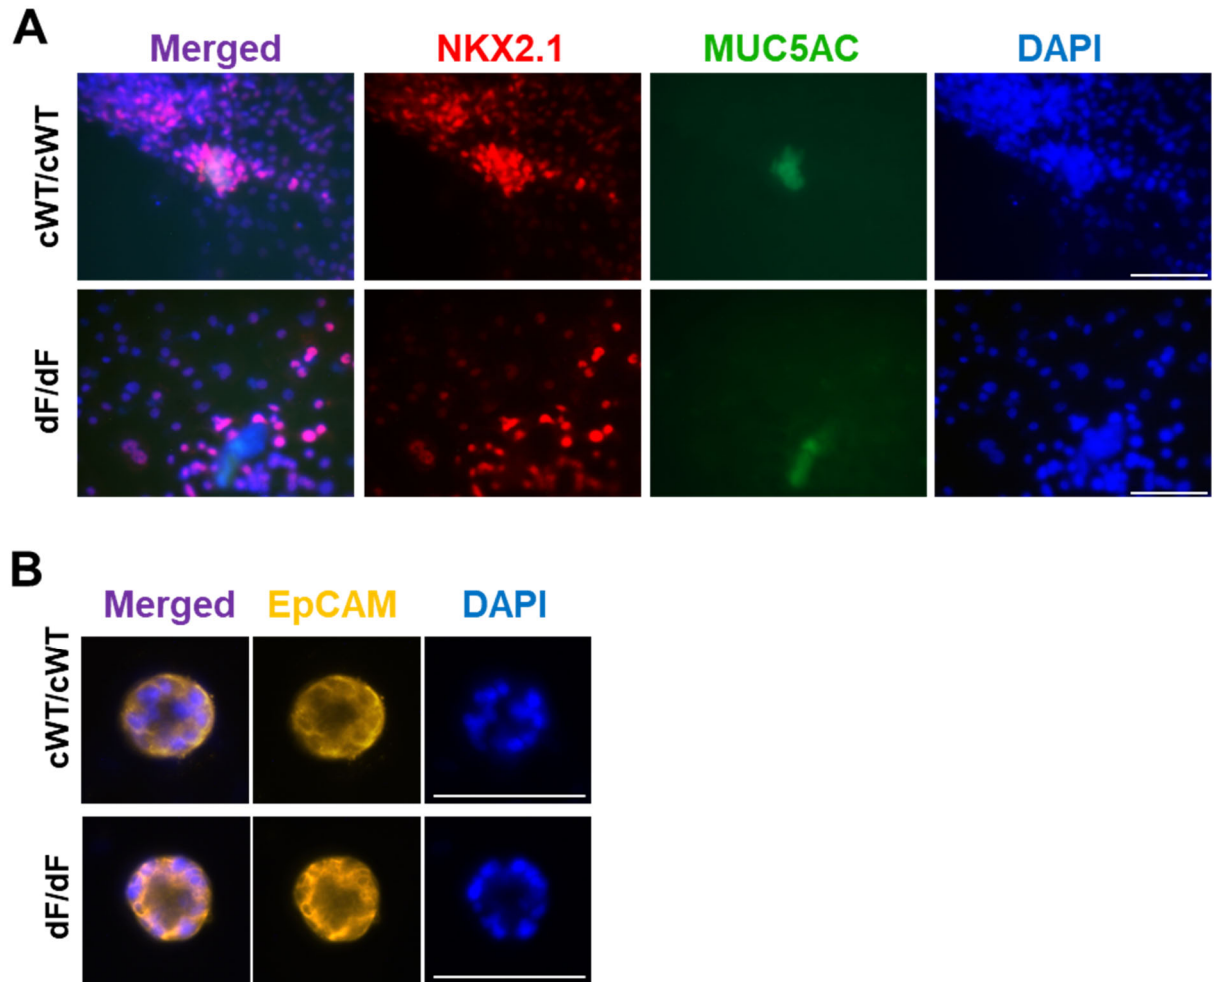

**Figure S2. Generation of HLOs from CF patient derived iPSCs.** (A) Representative immunofluorescence stains of NKX2-1 (red), MUC5AC (green), and nuclear protein expression with DNA stain (DAPI; blue) in D23 HLOs. Scale bars represent 100  $\mu\text{m}$ . (B) Representative immunofluorescence stains of EpCAM (Orange) and nuclear protein expression with DNA stain (DAPI; blue) in D23 HLOs. Scale bars represent 100  $\mu\text{m}$ .

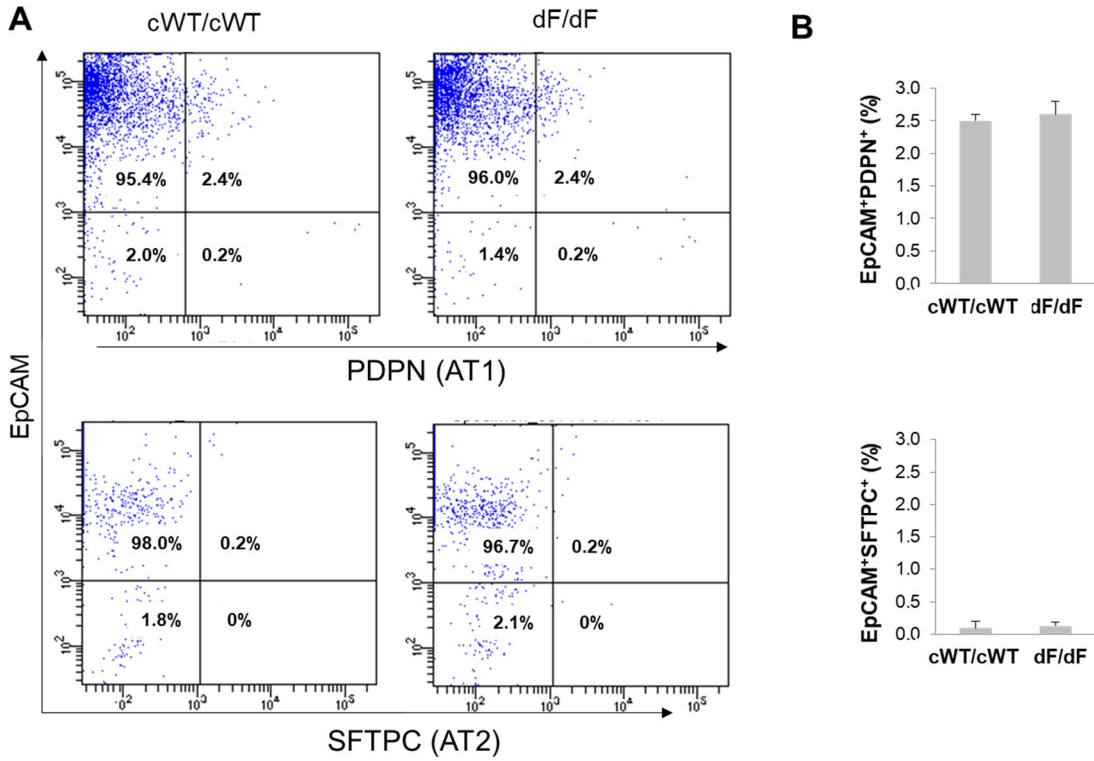

**Figure S3. Low percentage of alveolar epithelial type I (AT1) and type II (AT2) cells in HLOs.** (A) Representative flow cytometry result of EpCAM<sup>+</sup>/PDPN<sup>+</sup> (AT1) and EpCAM<sup>+</sup>/SFTPC<sup>+</sup> (AT2) in D23 HLOs. (B) Quantitative summary of EpCAM<sup>+</sup>/PDPN<sup>+</sup> (AT1) and EpCAM<sup>+</sup>/SFTPC<sup>+</sup> (AT2) percentages from flow cytometry results.

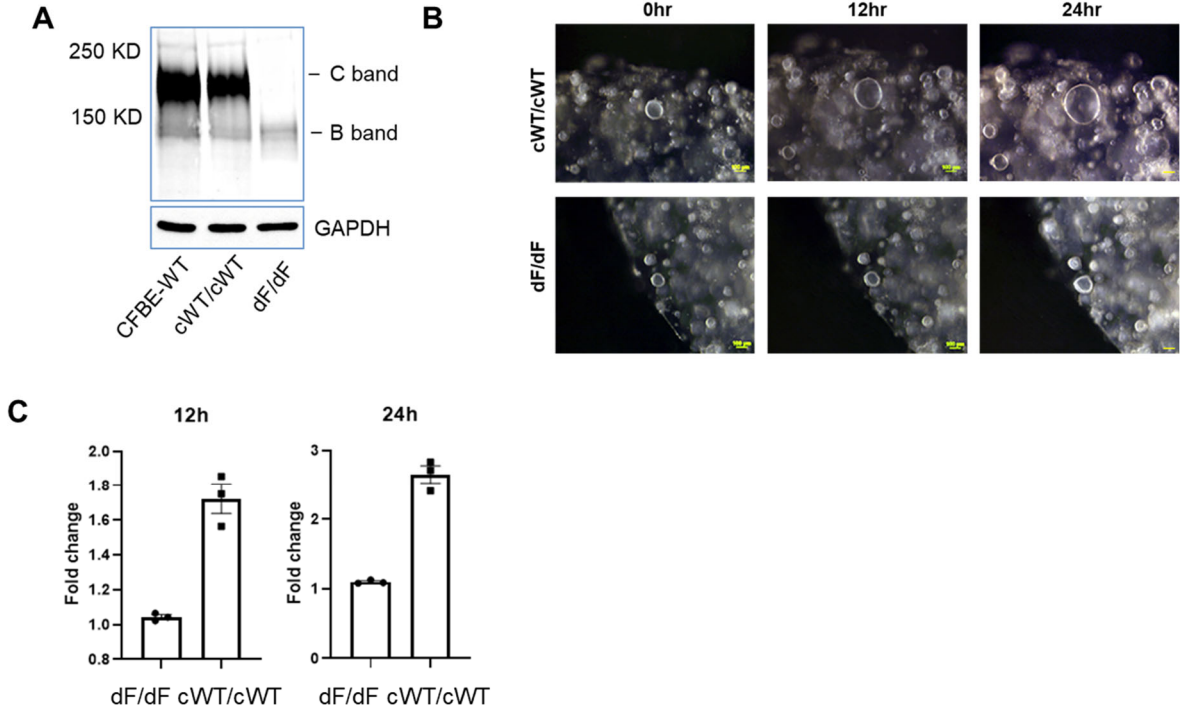

**Figure S4. Gene correction restores Forskolin stimulated Proximal Lung Organoid swelling capacity** (A) Western blot analysis of CFTR and GAPDH (loading control) in cWT/cWT and dF/dF organoids. CFBE-WT cells were used as positive Control. (B) Time-lapse phase contrast images of Fsk-induced swelling of cWT/cWT and dF/dF HLOs. Scale bars represent 100  $\mu$ m. (C) Quantification of organoid swelling of cWT/cWT and dF/dF HLOs at 12h and 24h with Fsk stimulation.

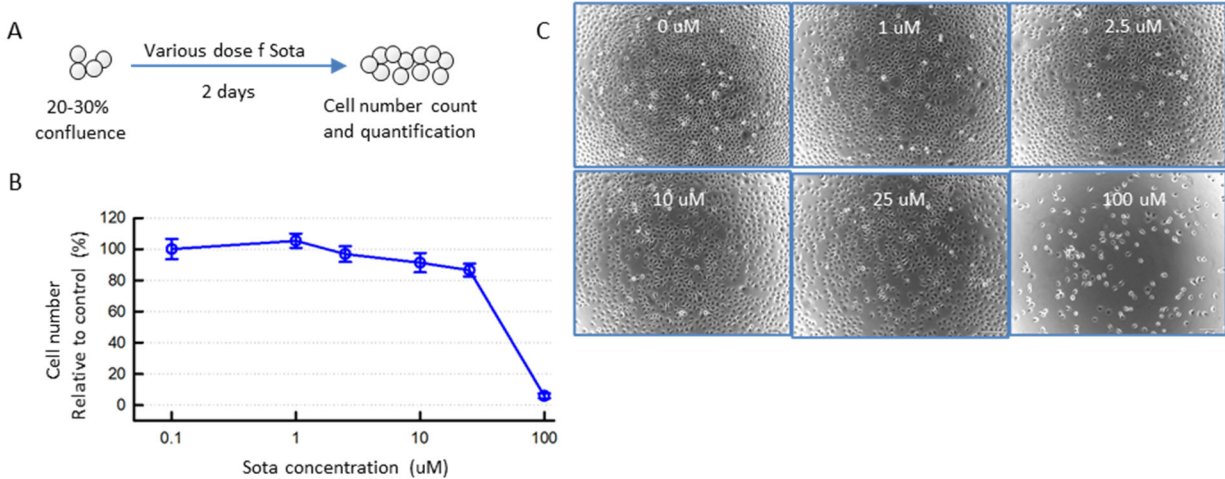

**Figure S5. Determine toxic effects of Sota (LX4211) human airway basal cells. (A)**

Schematic illustration of the experimental strategy. In brief, human airway basal cells were cultured at initial seeding density of 20-30% in SAGM medium alone or medium containing various concentration of Sota for 2 days. The cells were then dissociated for total number counting. (B) The plot of total cell number relative to that without Sota treatment (n=3 of independent experiment). (C) The representative brightfield images of airway basal cells cultured in various doses of Sota.

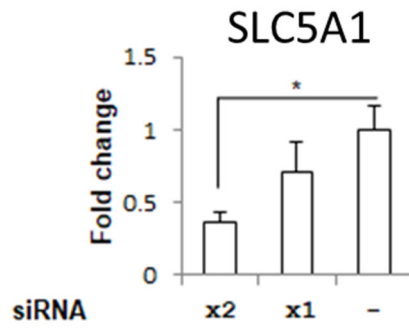

**Figure S6. Knockdown of SLC5A1.** Expression level of SLC5A1 in dF/dF HLOs achieved by two times transfections by SLC5A1 targeting siRNA (“x2”), one time transfection by SLC5A1 targeting siRNA (“x1”), or by a non-targeting siRNA (“-“).

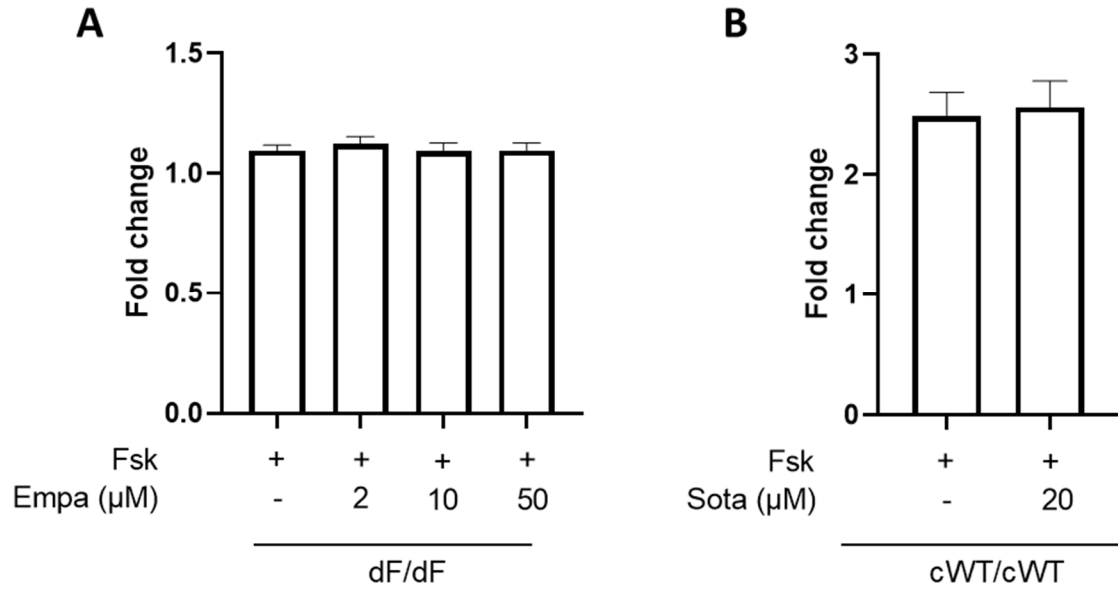

**Figure S7. Quantification of organoid swelling.** (A) dF/dF HLOs treated with different concentrations of Empa. (B) cWT/cWT HLOs treated with Sota.



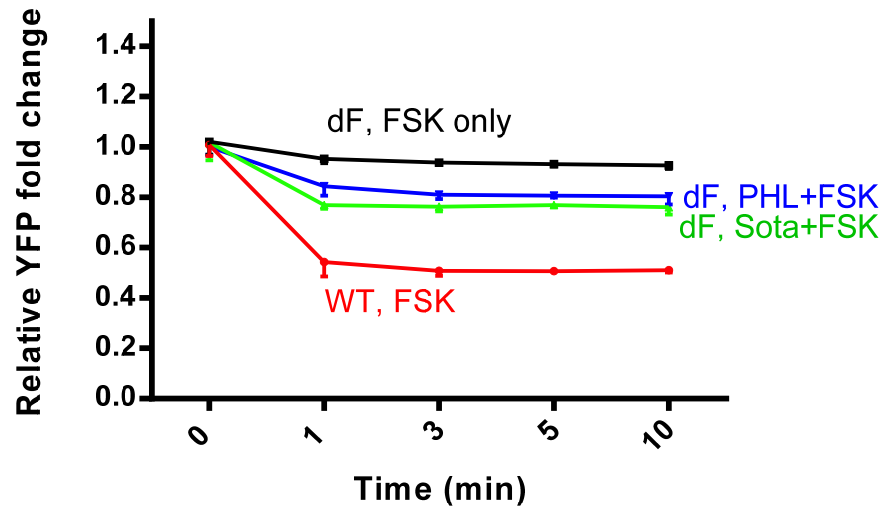

**Figure S8. Relative fold change of YFP signals of CFBE-WT (red) and CFBE-dF cells in the Premo Halide Sensor Assay.** CFBE-dF cells were treated with Fsk only (black) or Fsk with PHL (blue) or Sota (green). N=3 replicates using different plates of WT or CFBE-dF cells.

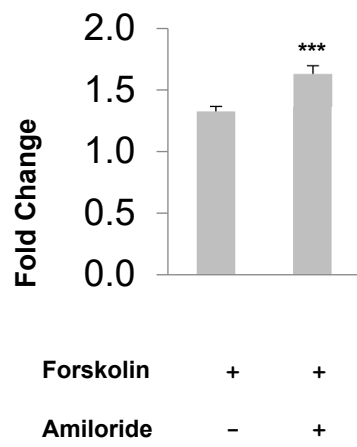

**Figure S9. Effects of Amiloride on dF/dF HLO swelling. \*\*\* P<0.005**

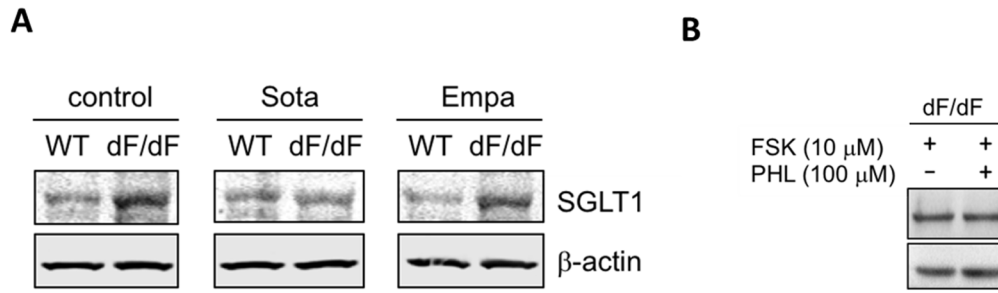

**Figure S10. Effects of SGLT inhibitors on SGLT1 protein levels in HLOs.** (A) Western blot results of SGLT1 levels in cWT/cWT (WT) and dF/dF HLOs after vehicle, Sota or Empa treatments. (B) Western blot results of SGLT1 levels in dF/dF HLOs after vehicle (Fsk only) or PHL treatments.

**Table S1.** List of selected SGLT inhibitors (adapted from Ref (12)).

| <b>Drug</b> | <b>Status</b>                 | <b>Selectivity SGLT2: SGLT1</b> |
|-------------|-------------------------------|---------------------------------|
| Cana        | FDA & EMA approved            | ~250-fold                       |
| Dapa        | FDA & EMA approved            | ~1,200-fold                     |
| Empa        | FDA & EMA approved            | ~2,500-fold                     |
| Sota        | EMA approved                  | ~20-fold                        |
| PHL         | Not approved for clinical use | ~ 1-fold                        |
